# Supplementary material for: Salmonella Uses Energy Taxis to Benefit from Intestinal Inflammation
Source: PubMed Central journal article supplement (PMC3630101; doi:10.1371/journal.ppat.1003267), 2013-04-18

**A**

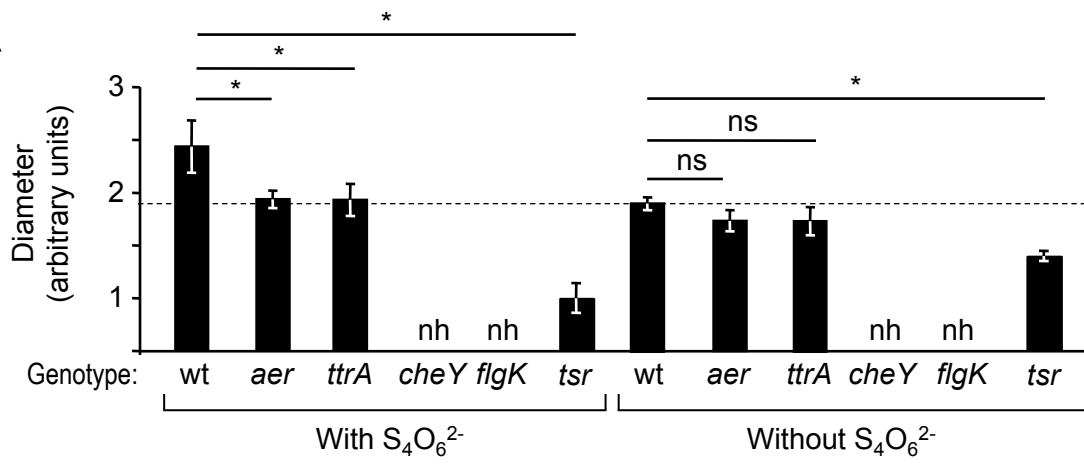

**B**

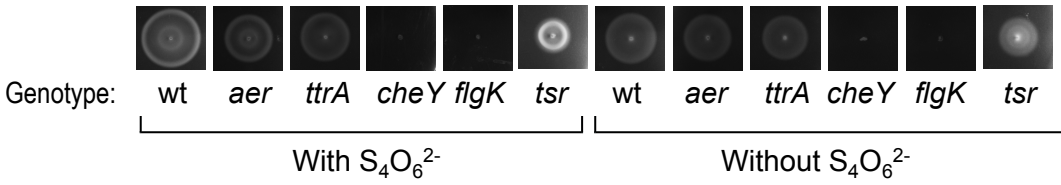

**C**

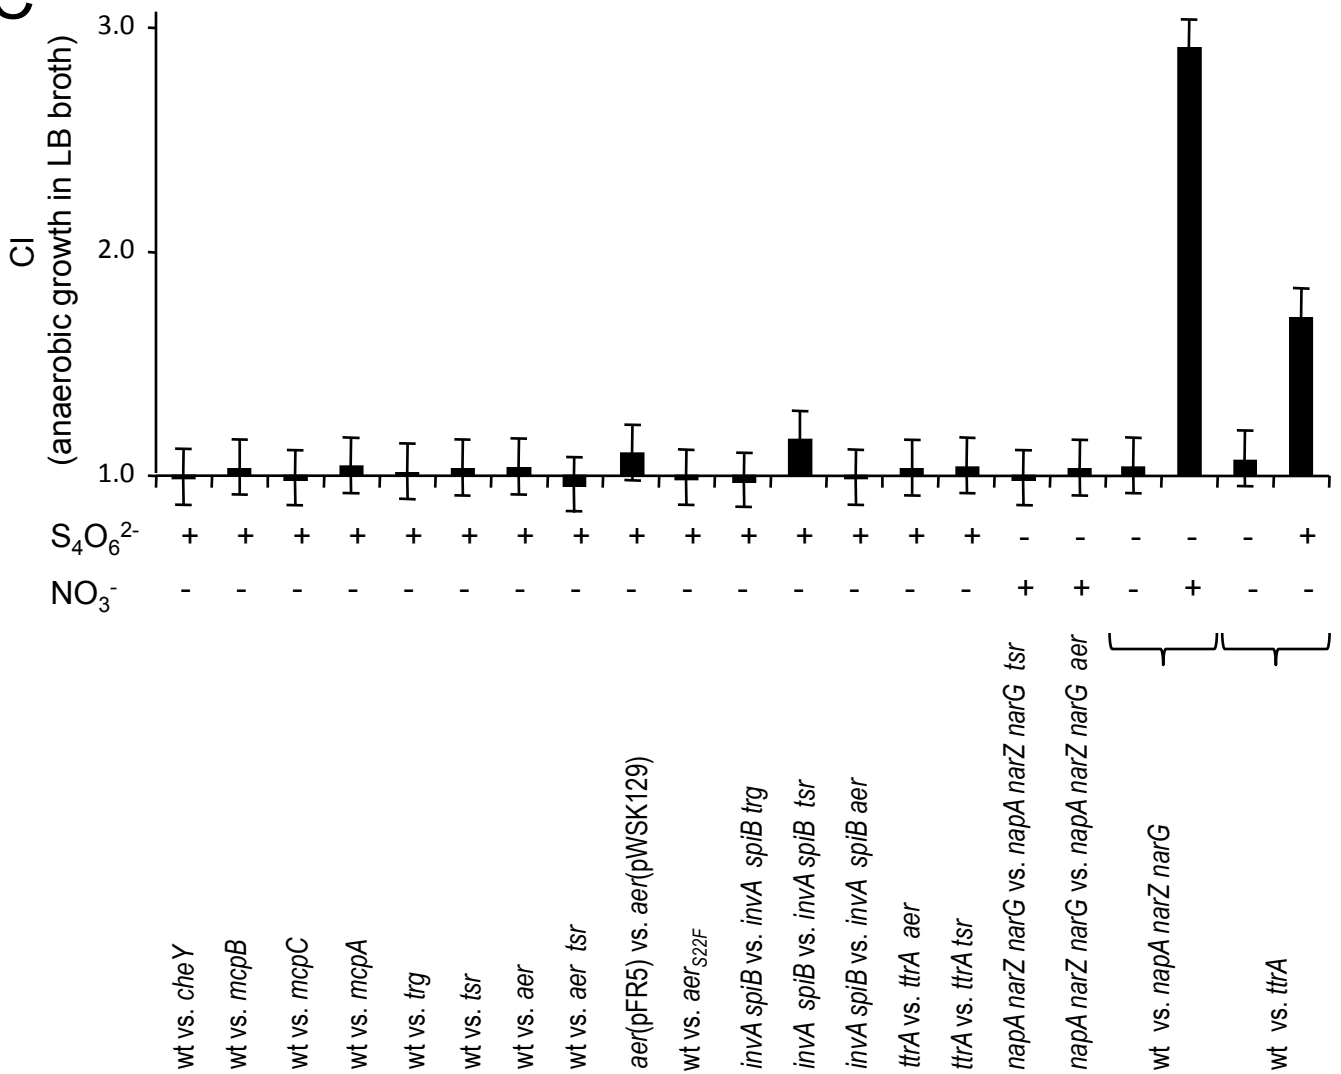

Supplement: ppat.1003267.s003.pdf [file ppat.1003267.s003.pdf]
