# Supplementary material for: Salmonella Uses Energy Taxis to Benefit from Intestinal Inflammation
Source: PubMed Central journal article supplement (PMC3630101; doi:10.1371/journal.ppat.1003267), 2013-04-18

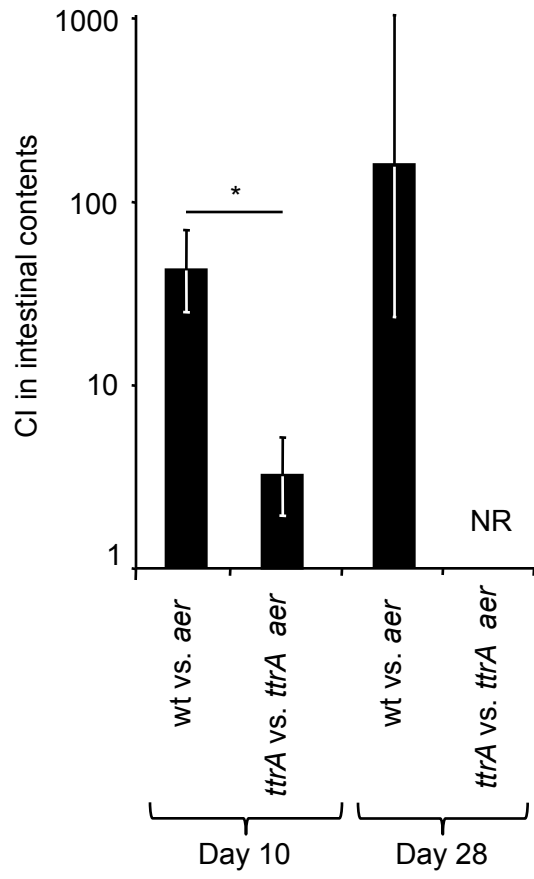

Supplement: ppat.1003267.s004.pdf [file ppat.1003267.s004.pdf]
