# Supplementary material for: Salmonella Uses Energy Taxis to Benefit from Intestinal Inflammation
Source: PubMed Central journal article supplement (PMC3630101; doi:10.1371/journal.ppat.1003267), 2013-04-18
Supplement: ppat.1003267.s007.pdf [file ppat.1003267.s007.pdf]

Table S1: Calculation of competitive indices (CI) for capillary assay

| competition                                         | S | genotype                  | I (G.M) C/ml | IR   | CFU/cap  | (OR) | CI (OR/IR) | in capillary |
|-----------------------------------------------------|---|---------------------------|--------------|------|----------|------|------------|--------------|
| wt vs. <i>aer</i>                                   | 1 | wt                        | 5.59E+07     | 1.05 | 2.44E+05 | 1.51 | 1.43       | T (5 mM)     |
|                                                     | 2 | <i>aer</i>                | 5.30E+07     |      | 1.62E+05 |      |            |              |
| <i>aer</i> (pFR5) vs. <i>aer</i>                    | 1 | <i>aer</i> (pFR5)         | 4.14E+07     | 1.05 | 2.94E+05 | 1.57 | 1.49       | T (5 mM)     |
|                                                     | 2 | <i>aer</i>                | 3.94E+07     |      | 1.88E+05 |      |            |              |
| wt vs. <i>aer</i> <sub>FAD</sub>                    | 1 | wt                        | 3.60E+07     | 1.06 | 2.71E+05 | 1.70 | 1.61       | T (5 mM)     |
|                                                     | 2 | <i>aer</i> <sub>FAD</sub> | 3.41E+07     |      | 1.59E+05 |      |            |              |
| <i>ttrA</i> vs. <i>ttrA aer</i>                     | 1 | <i>ttrA</i>               | 3.15E+07     | 1.08 | 8.32E+04 | 1.10 | 1.02       | T (5 mM)     |
|                                                     | 2 | <i>ttrA aer</i>           | 2.92E+07     |      | 7.54E+04 |      |            |              |
| wt vs. <i>tsr</i>                                   | 1 | wt                        | 3.13E+07     | 0.91 | 1.82E+05 | 0.98 | 1.07       | T (5 mM)     |
|                                                     | 2 | <i>tsr</i>                | 3.44E+07     |      | 1.86E+05 |      |            |              |
| <i>ttrA</i> vs. <i>ttrA tsr</i>                     | 1 | <i>ttrA</i>               | 3.14E+07     | 0.99 | 1.10E+05 | 1.08 | 1.10       | T (5 mM)     |
|                                                     | 2 | <i>ttrA tsr</i>           | 3.18E+07     |      | 1.02E+05 |      |            |              |
| wt vs. <i>aer</i>                                   | 1 | wt                        | 5.59E+07     | 1.05 | 1.05E+05 | 1.03 | 0.98       | B            |
|                                                     | 2 | <i>aer</i>                | 5.30E+07     |      | 1.02E+05 |      |            |              |
| <i>aer</i> (pFR5) vs. <i>aer</i>                    | 1 | <i>aer</i> (pFR5)         | 4.14E+07     | 1.05 | 1.29E+05 | 1.08 | 1.02       | B            |
|                                                     | 2 | <i>aer</i>                | 3.94E+07     |      | 1.20E+05 |      |            |              |
| wt vs. <i>aer</i> <sub>FAD</sub>                    | 1 | wt                        | 3.60E+07     | 1.06 | 1.39E+05 | 1.03 | 0.97       | B            |
|                                                     | 2 | <i>aer</i> <sub>FAD</sub> | 3.41E+07     |      | 1.36E+05 |      |            |              |
| <i>ttrA</i> vs. <i>ttrA aer</i>                     | 1 | <i>ttrA</i>               | 3.15E+07     | 1.08 | 6.33E+04 | 0.91 | 0.85       | B            |
|                                                     | 2 | <i>ttrA aer</i>           | 2.92E+07     |      | 6.93E+04 |      |            |              |
| wt vs. <i>tsr</i>                                   | 1 | wt                        | 3.13E+07     | 0.91 | 6.85E+04 | 0.86 | 0.94       | B            |
|                                                     | 2 | <i>tsr</i>                | 3.44E+07     |      | 8.01E+04 |      |            |              |
| wt vs. <i>aer</i>                                   | 1 | wt                        | 4.09E+07     | 1.02 | 1.07E+05 | 0.83 | 0.81       | T (5mM) (02) |
|                                                     | 2 | <i>aer</i>                | 4.00E+07     |      | 1.28E+05 |      |            |              |
| wt vs. <i>aer</i>                                   | 1 | wt                        | 2.60E+07     | 0.80 | 2.49E+05 | 1.51 | 1.87       | N ( 5mM)     |
|                                                     | 2 | <i>aer</i>                | 3.23E+07     |      | 1.65E+05 |      |            |              |
| <i>napA narZ narG</i> vs. <i>napA narZ narG aer</i> | 1 | NR                        | 3.35E+07     | 1.20 | 4.66E+04 | 1.01 | 0.84       | N ( 5mM)     |
|                                                     | 2 | NR <i>aer</i>             | 2.79E+07     |      | 4.61E+04 |      |            |              |
| wt vs. <i>aer</i>                                   | 1 | wt                        | 3.84E+07     | 1.10 | 3.07E+05 | 1.32 | 1.21       | N (1 mM)     |
|                                                     | 2 | <i>aer</i>                | 3.51E+07     |      | 2.32E+05 |      |            |              |
| wt vs. <i>tsr</i>                                   | 1 | wt                        | 3.56E+07     | 0.99 | 3.25E+05 | 1.03 | 1.04       | N (1 mM)     |
|                                                     | 2 | <i>tsr</i>                | 3.59E+07     |      | 3.17E+05 |      |            |              |
| wt vs. <i>aer</i>                                   | 1 | wt                        | 3.84E+07     | 1.10 | 2.75E+05 | 0.87 | 0.80       | N (0.1 mM)   |
|                                                     | 2 | <i>aer</i>                | 3.51E+07     |      | 3.15E+05 |      |            |              |
| wt vs. <i>tsr</i>                                   | 1 | wt                        | 3.56E+07     | 0.99 | 3.32E+05 | 2.19 | 2.21       | N (0.1 mM)   |
|                                                     | 2 | <i>tsr</i>                | 3.59E+07     |      | 1.52E+05 |      |            |              |
| <i>tsr</i> (pFR6) vs. <i>tsr</i>                    | 1 | <i>tsr</i> (pFR6)         | 4.91E+07     | 0.98 | 3.46E+05 | 2.12 | 2.16       | N (0.1 mM)   |
|                                                     | 2 | <i>tsr</i>                | 5.00E+07     |      | 1.63E+05 |      |            |              |
| <i>napA narZ narG</i> vs. <i>napA narZ narG tsr</i> | 1 | NR                        | 3.65E+07     | 1.08 | 4.56E+04 | 1.00 | 0.93       | N (0.1 mM)   |
|                                                     | 2 | NR <i>aer</i>             | 3.38E+07     |      | 4.55E+04 |      |            |              |
| wt vs. <i>aer</i>                                   | 1 | wt                        | 3.84E+07     | 1.10 | 2.55E+05 | 0.88 | 0.80       | N (0.1 mM)   |
|                                                     | 2 | <i>aer</i>                | 3.51E+07     |      | 2.90E+05 |      |            |              |
| wt vs. <i>tsr</i>                                   | 1 | wt                        | 3.56E+07     | 0.99 | 2.89E+05 | 1.23 | 1.24       | N (0.1 mM)   |
|                                                     | 2 | <i>tsr</i>                | 3.59E+07     |      | 2.35E+05 |      |            |              |
| wt vs. <i>aer</i>                                   | 1 | wt                        | 2.60E+07     | 0.80 | 6.07E+04 | 0.77 | 0.95       | B            |
|                                                     | 2 | <i>aer</i>                | 3.23E+07     |      | 7.93E+04 |      |            |              |
| wt vs. <i>tsr</i>                                   | 1 | wt                        | 3.56E+07     | 0.99 | 1.29E+05 | 0.99 | 1.00       | B            |
|                                                     | 2 | <i>tsr</i>                | 3.59E+07     |      | 1.30E+05 |      |            |              |

Table S1: Calculation of competitive indices (CI) for capillary assay

|                                  |   |                   |                 |      |                 |             |      |                 |
|----------------------------------|---|-------------------|-----------------|------|-----------------|-------------|------|-----------------|
| <i>tsr</i> (pFR6) vs. <i>tsr</i> | 1 | <i>tsr</i> (pFR6) | <b>4.91E+07</b> | 0.98 | <b>1.34E+05</b> | 0.99        | 1.01 | B               |
|                                  | 2 | <i>tsr</i>        | <b>5.00E+07</b> |      | <b>1.35E+05</b> |             |      |                 |
| wt vs. <i>aer</i>                | 1 | wt                | <b>4.51E+07</b> | 1.11 | <b>5.62E+04</b> | 0.86        | 0.77 | N (5 Mm) (02)   |
|                                  | 2 | <i>aer</i>        | <b>4.08E+07</b> |      | <b>6.56E+04</b> |             |      |                 |
| wt vs. <i>tsr</i>                | 1 | wt                | <b>3.56E+07</b> | 0.99 | <b>1.17E+05</b> | <b>0.88</b> | 0.89 | N (0.1 mM) (02) |
|                                  | 2 | <i>tsr</i>        | <b>3.59E+07</b> |      | <b>1.34E+05</b> |             |      |                 |
